# Supplementary material
Source: PubMed Central journal article supplement (PMC6800341)
Supplement: pnas.1818532116.sapp.pdf [file pnas.1818532116.sapp.pdf]

# Supplementary Figures and Tables

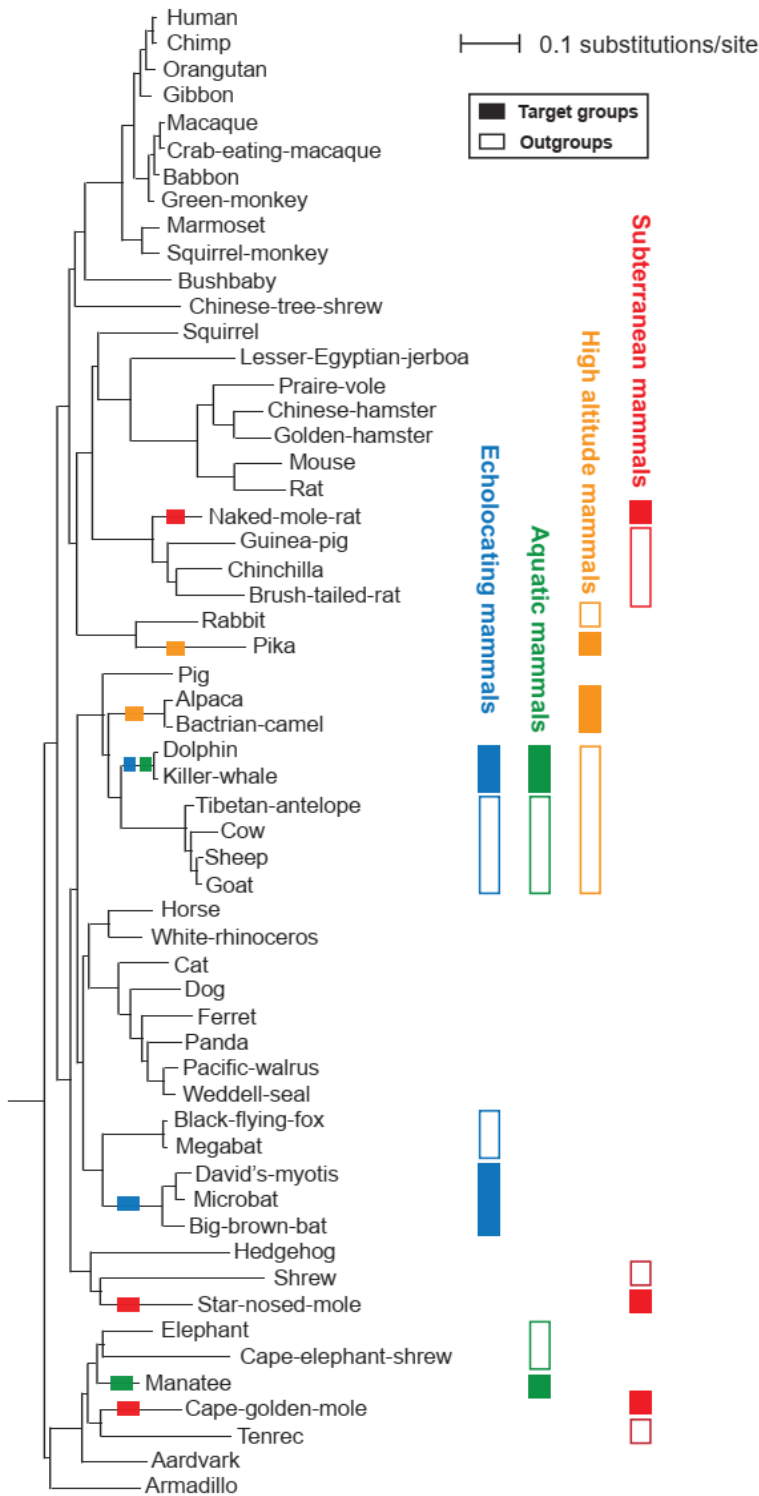

**Figure S1. Weighted phylogenetic tree.** A substitution per site weighted tree of the 57 species used in our screen. Filled rectangles mark target groups and empty rectangles mark outgroups for lineages with independent phenotypic evolution of echolocating (blue), aquatic (green), high-altitude (orange) and subterranean (red) lifestyles.

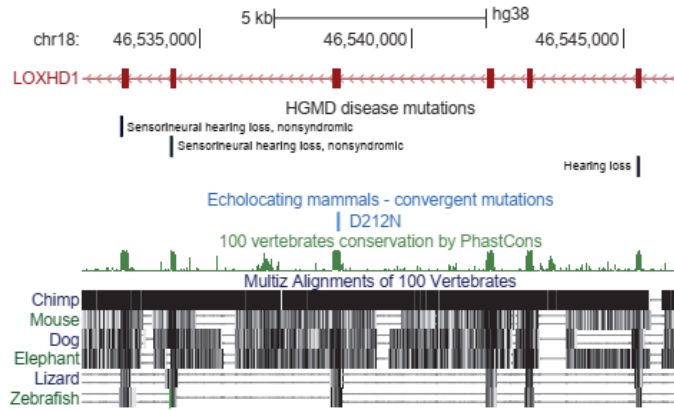

|                        |   |   |   |   |   |   |   |
|------------------------|---|---|---|---|---|---|---|
| Human                  | I | N | A | D | T | G | A |
| Chimp                  | I | N | A | D | T | G | A |
| Gorilla                | I | N | A | D | T | G | A |
| Orangutan              | I | N | A | D | T | G | A |
| Gibbon                 | I | N | A | D | T | G | A |
| Rhesus                 | I | N | A | D | T | G | A |
| Crab-eating_macaque    | I | N | A | D | T | G | A |
| Baboon                 | I | N | A | D | T | G | A |
| Green_monkey           | I | N | A | D | T | G | A |
| Marmoset               | I | N | A | D | T | G | A |
| Bushbaby               | I | N | A | D | T | G | A |
| Chinese_tree_shrew     | I | N | A | D | T | G | A |
| Squirrel               | I | N | A | D | T | G | A |
| Lesser_Egyptian_jerboa | I | N | S | D | T | G | A |
| Prairie_vole           | I | N | S | D | T | G | A |
| Golden_hamster         | I | N | A | D | T | G | A |
| Mouse                  | I | N | A | D | T | G | A |
| Rat                    | V | N | A | D | T | G | A |
| Naked_mole-rat         | I | N | A | D | T | G | A |
| Guinea_pig             | I | N | A | D | T | G | A |
| Chinchilla             | I | N | A | D | T | G | A |
| Brush-tailed_rat       | I | N | S | D | T | G | A |
| Rabbit                 | I | N | A | D | T | G | A |
| Pika                   | I | N | A | D | T | G | A |
| Pig                    | I | N | S | D | T | G | A |
| Alpaca                 | I | N | A | D | T | G | A |
| Bactrian_camel         | I | N | A | D | T | G | A |
| Dolphin                | I | N | A | N | T | G | A |
| Killer_whale           | I | N | A | N | T | G | A |
| Tibetan_antelope       | I | N | A | D | T | G | A |
| Cow                    | I | N | A | D | T | G | A |
| Sheep                  | I | N | A | D | T | G | A |
| Domestic_goat          | I | N | A | D | T | G | A |
| Horse                  | I | N | A | D | T | G | A |
| White_rhinoceros       | I | N | A | D | T | G | A |
| Cat                    | I | N | A | D | T | G | A |
| Dog                    | I | N | A | D | T | G | A |
| Ferret                 | I | N | A | D | T | G | A |
| Panda                  | I | N | A | D | T | G | A |
| Pacific_walrus         | I | N | A | D | T | G | A |
| Weddell_seal           | I | N | A | D | T | G | A |
| Black_flying-fox       | I | N | A | D | T | G | A |
| Megabat                | I | N | A | D | T | G | A |
| David's_myotis_(bat)   | V | N | A | N | T | G | A |
| Microbat               | V | N | A | N | T | G | A |
| Big_brown_bat          | V | S | A | N | T | G | A |
| Hedgehog               | I | N | A | D | T | G | A |
| Shrew                  | I | N | A | D | T | G | A |
| Star-nosed_mole        | I | N | A | D | T | G | A |
| Elephant               | I | N | A | D | T | G | A |
| Cape_elephant_shrew    | I | N | A | D | T | G | A |
| Manatee                | I | N | A | D | T | G | A |
| Cape_golden_mole       | I | N | A | D | T | G | A |
| Tenrec                 | I | N | A | D | T | G | A |
| Aardvark               | I | N | A | D | T | G | A |
| Armadillo              | I | N | A | D | T | G | A |
| Opossum                | I | S | A | D | T | G | A |
| Tasmanian_devil        | I | S | A | D | T | G | A |
| Platypus               | V | D | A | D | T | G | A |
| Saker_falcon           | V | D | A | D | T | G | A |
| White-throated_sparrow | V | D | A | D | T | G | A |
| Parrot                 | V | D | A | D | T | G | A |
| Rock_pigeon            | V | D | A | D | T | G | A |
| Chicken                | V | D | A | D | T | G | A |
| Green_seaturtle        | V | D | A | D | T | G | A |
| Lizard                 | V | D | A | D | T | G | A |
| X_tropicalis           | V | D | A | D | T | G | A |
| Coelacanth             | V | D | A | D | T | G | A |
| Tetraodon              | V | D | A | D | T | G | A |
| Fugu                   | V | D | A | D | T | G | A |
| Medaka                 | V | D | A | D | T | G | A |
| Stickleback            | V | D | A | D | T | G | A |
| Zebrafish              | V | N | A | D | T | G | A |
| Spotted_gar            | V | D | A | D | T | G | A |

**Figure S2. Example of striking convergent substitution in echolocating mammals across a vertebrate multiple alignment.** The functional enrichments reported in this study are composed of highly compelling molecular events. Convergent substitution D212N in *LOXHD1* gene is shown where the canonical amino acid is deeply conserved, suggesting that the independent D->N change in the two echolocating lineages is functionally important. *LOXHD1* is a well-established hearing loss gene in both humans and mice (1), but it has not been previously implicated in echolocation. While one could sift for this particular substitution in the hundreds of events we detect (Table S3), our test highlights it as part of a group of cochlear ganglion development genes (Fig. 2a, Tables 1 and 2), most affected by similarly striking convergent amino acid substitutions.

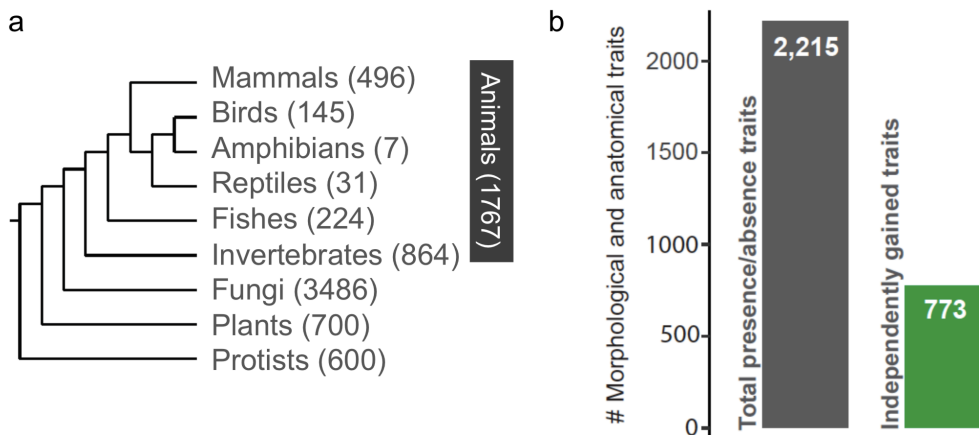

**Figure S3. Available genotypic and phenotypic data for future exploration of the molecular basis of convergent evolution.** **a**, The growing number of publicly available genomes at NCBI, by taxonomy. **b**, summary analysis of a large scale phenotypic study(2) that scores thousands of morphological and physiological traits (grey bar) for presence/absence reveals that a full 35% of scored traits (such as echolocation) are independently gained traits (green bar), conceptually amenable to our approach.

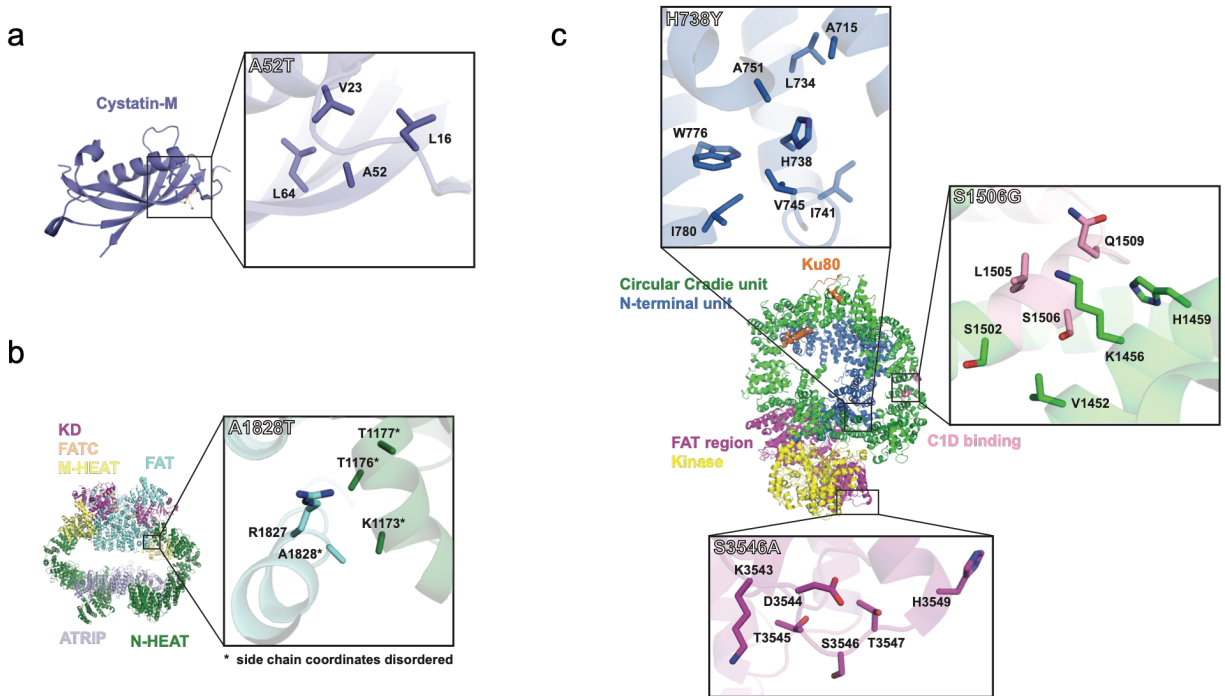

**Figure S4. Protein structure evidence for functional significance of convergent substitutions.**

**a**, Based on a structural model of Cystatin-M (encoded by *CST6*) from PDB 4N6L, the side chain of residue A52 interacts with nearby hydrophobic residues in the wildtype protein. The convergent substitution at position 52 to a more polar threonine residue would thus destabilize the protein by disrupting the hydrophobic interaction. **b**, Structure of ATR-ATRIP complex from PDB 5YZO. Residue A1828 is surrounded by hydrophilic residues (K1173, T1176, and T1177 of the N-HEAT domain and R1827 of the FAT domain). A1828T could enhance polar contacts with nearby residues and thus stabilize the binding interface between N-HEAT and FAT domains. **c**, Structure of DNA-PKcs in complex with Ku80 from PDB 5LUQ. Residue H738 is buried within the hydrophobic interior of DNA-PKcs. H738Y could stabilize the hydrophobic interaction and increase DNA-PKcs activity.

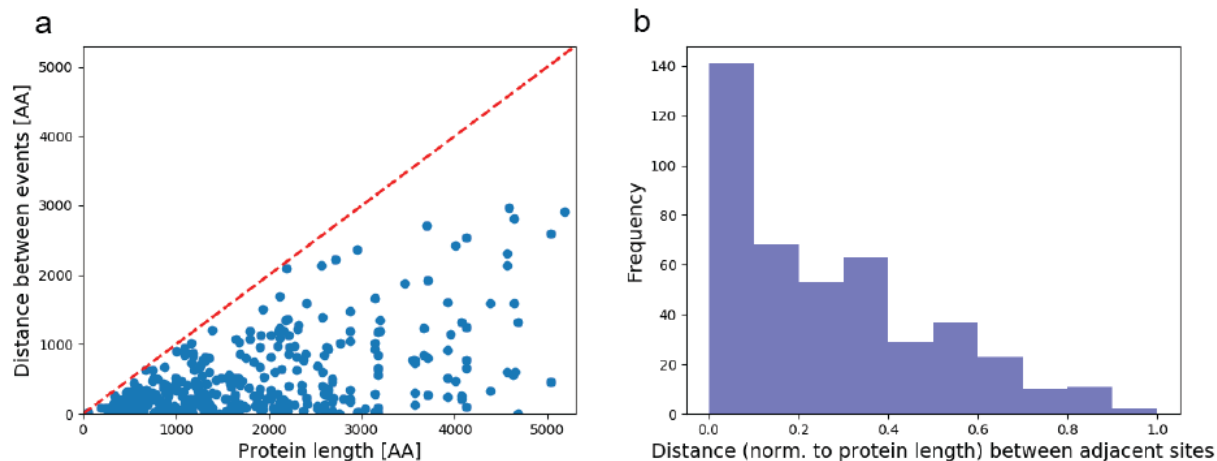

**Figure S5. Pairwise distances between adjacent convergent residues within the same gene. a,** Scatter plot of distance (in codon space) between adjacent amino acid (AA) convergence events in the same gene (Y-axis) and the corresponding protein length (X-axis) for all 437 pairs of same-gene adjacent convergent residues across the three convergence tests (echolocating, high-altitude and aquatic mammals). **b,** Histogram of the distance (in codon space, normalized to protein length) between same-gene adjacent convergent sites for all three convergence tests (echolocating, high-altitude, and aquatic mammals).

| Species                | Name                           | Assembly | Species              | Name                                  | Assembly   |
|------------------------|--------------------------------|----------|----------------------|---------------------------------------|------------|
| Panda                  | <i>Ailuropoda melanoleuca</i>  | ailMel1  | Ferret               | <i>Mustela putorius furo</i>          | musFur1    |
| Cow                    | <i>Bos taurus</i>              | bosTau8  | David's myotis (bat) | <i>Myotis davidii</i>                 | myoDav1    |
| Marmoset               | <i>Callithrix jacchus</i>      | calJac3  | Microbat             | <i>Myotis lucifugus</i>               | myoLuc2    |
| Bactrian camel         | <i>Camelus ferus</i>           | camFer1  | Gibbon               | <i>Nomascus leucogenys</i>            | nomLeu3    |
| Dog                    | <i>Canis lupus familiaris</i>  | canFam3  | Pika                 | <i>Ochotona princeps</i>              | ochPri3    |
| Domestic goat          | <i>Capra hircus</i>            | capHir1  | Brush-tailed rat     | <i>Octodon degus</i>                  | octDeg1    |
| Guinea Pig             | <i>Cavia porcellus</i>         | cavPor3  | Pacific walrus       | <i>Odobenus rosmarus divergens</i>    | odoRosDiv1 |
| White Rhino            | <i>Ceratotherium simum</i>     | cerSim1  | Killer whale         | <i>Orcinus orca</i>                   | orcOrc1    |
| Chinchilla             | <i>Chinchilla lanigera</i>     | chiLan1  | Aardvark             | <i>Orycteropus afer</i>               | oryAfe1    |
| Green monkey           | <i>Chlorocebus sabaeus</i>     | chlSab2  | Rabbit               | <i>Oryctolagus cuniculus</i>          | oryCun2    |
| Cape golden mole       | <i>Chrysochloris asiatica</i>  | chrAsi1  | Bushbaby             | <i>Otolemur garnettii</i>             | otoGar3    |
| Star-nosed mole        | <i>Condylura cristata</i>      | conCri1  | Sheep                | <i>Ovis aries</i>                     | oviAri3    |
| Chinese Hamster        | <i>Cricetulus griseus</i>      | criGri1  | Tibetan antelope     | <i>Pantholops hodgsonii</i>           | panHod1    |
| Armadillo              | <i>Dasypus novemcinctus</i>    | dasNov3  | Chimp                | <i>Pan troglodytes</i>                | panTro5    |
| Tenrec                 | <i>Echinops telfairi</i>       | echTel2  | Baboon               | <i>Papio hamadryas</i>                | papAnu2    |
| Cape elephant shrew    | <i>Elephantulus edwardii</i>   | eleEdw1  | Orangutan            | <i>Pongo pygmaeus abelii</i>          | ponAbe2    |
| Big brown bat          | <i>Eptesicus fuscus</i>        | eptFus1  | Black flying fox     | <i>Pteropus alecto</i>                | pteAle1    |
| Horse                  | <i>Equus caballus</i>          | equCab2  | Megabat              | <i>Pteropus vampyrus</i>              | pteVam1    |
| Hedgehog               | <i>Erinaceus europaeus</i>     | eriEur2  | Rhesus macaque       | <i>Macaca mulatta</i>                 | rheMac8    |
| Cat                    | <i>Felis catus</i>             | felCat8  | Rat                  | <i>Rattus norvegicus</i>              | rn6        |
| Naked mole rat         | <i>Heterocephalus glaber</i>   | hetGla2  | Squirrel monkey      | <i>Saimiri boliviensis</i>            | saiBol1    |
| Human                  | <i>Homo sapiens</i>            | hg38     | Shrew                | <i>Sorex araneus</i>                  | sorAra2    |
| Lesser Egyptian jerboa | <i>Jaculus jaculus</i>         | jacJac1  | Squirrel             | <i>Spermophilus tridecemlineatus</i>  | speTri2    |
| Weddell seal           | <i>Leptonychotes weddellii</i> | lepWed1  | Pig                  | <i>Sus scrofa</i>                     | susScr3    |
| Elephant               | <i>Loxodonta africana</i>      | loxAfr3  | Manatee              | <i>Trichechus manatus latirostris</i> | triMan1    |
| Crab-eating macaque    | <i>Macaca fascicularis</i>     | macFas5  | Chinese tree shrew   | <i>Tupaia chinensis</i>               | tupChi1    |
| Golden hamster         | <i>Mesocricetus auratus</i>    | mesAur1  | Bottlenose dolphin   | <i>Tursiops truncatus</i>             | turTru2    |
| Prairie vole           | <i>Microtus ochrogaster</i>    | micOch1  | Alpaca               | <i>Vicugna pacos</i>                  | vicPac2    |
| Mouse                  | <i>Mus musculus</i>            | mm10     |                      |                                       |            |

**Table S1. Species list.** The 57 placental mammal species and genome assemblies used in this study.

| Experiment             | MGI terms tested | MGI-annotated sites | MGI-annotated genes | Convergent sites | Convergent genes | Divergent sites | Divergent genes |
|------------------------|------------------|---------------------|---------------------|------------------|------------------|-----------------|-----------------|
| Echolocation           | 4,300            | 3,009,534           | 6,718               | 781              | 665              | 1,140           | 913             |
| Aquatic                | 4,313            | 3,027,118           | 6,756               | 831              | 695              | 954             | 768             |
| High altitude          | 4,165            | 2,646,617           | 6,139               | 977              | 792              | 1,306           | 988             |
| Subterranean (moles-1) | 4,102            | 2,515,604           | 5,916               | 1,333            | 1,044            | 2,259           | 1,437           |
| Subterranean (moles-2) | 4,131            | 2,606,536           | 5,993               | 1,086            | 891              | 1,690           | 1,197           |
| Subterranean (moles-3) | 4,241            | 2,815,825           | 6,465               | 1,075            | 883              | 1,646           | 1,201           |

**Table S2. Key statistics from the molecular convergence test.** For each of the six experiments, we show the number of MGI terms tested for enrichment of convergence and divergence, the total number of testable amino acid positions (*MGI-annotated sites*) and the number of genes containing them (*MGI-annotated genes*), the number of convergent and divergent substitutions detected, and the number of genes harboring them. Moles-1: cape golden mole and star-nosed mole; moles-2: naked mole rat and star-nosed mole; moles-3: cape golden mole and naked mole rat.



| Convergent adaptation | Gene  | Amino acid substitution | Codon coordinates (GRCh38/hg38)                                | Human disease variant (GRCh38/hg38) <sup>(1)</sup>                                        | Source        | Position relative to variant (in codon space) <sup>(2)</sup> |
|-----------------------|-------|-------------------------|----------------------------------------------------------------|-------------------------------------------------------------------------------------------|---------------|--------------------------------------------------------------|
| Echololocation        | GJB2  | F115Y                   | chr13:20189237-20189239                                        | Sensorineural hearing loss (c.20189236delinsTA)                                           | HGMD          | +1                                                           |
|                       |       |                         |                                                                | Sensorineural hearing loss (c.20189238A>C)                                                | HGMD          | 0                                                            |
|                       |       |                         |                                                                | Deafness (c.20189241T>C)                                                                  | HGMD          | -1                                                           |
|                       |       |                         |                                                                | Deafness, autosomal recessive 1 (c.20189242T>C)                                           | HGMD          | -1                                                           |
|                       | CDH23 | N924S                   | chr10:71812589-71812591                                        | Usher syndrome 1d (c.71812588G>A)                                                         | HGMD          | -1                                                           |
|                       |       | D820E                   | chr10:71811415-71811417                                        | Non-syndromic autosomal recessive deafness (c.71811412C>A)                                | HGMD          | -1                                                           |
| TMPRSS3               | L385V | chr21:42376580-42376582 | Deafness, non-syndromic, autosomal recessive (c.42376579A>G)   | HGMD                                                                                      | +1            |                                                              |
|                       |       |                         | Deafness, autosomal recessive 8, not specified (c.42376583A>G) | ClinVar                                                                                   | -1            |                                                              |
| Aquatic               | LDLR  | L422V                   | chr19:11113355-11113357                                        | Hypercholesterolaemia (c.11113356T>C or c.11113356T>G)                                    | HGMD, ClinVar | 0                                                            |
|                       | TRPV3 | R148Q                   | chr17:3543496-3543498                                          | Palmoplantar keratoderma, mutilating, with periorificial keratotic plaques (c.3543498C>G) | ClinVar       | 0                                                            |
|                       | XPA   | V234L                   | chr9:97675559-97675561                                         | Improved adduct removal (c.97675561C>A)                                                   | HGMD          | 0                                                            |
| High altitude         | NPC1  | I663M                   | chr18:23544485-23544487                                        | Niemann-Pick disease C (c.23544484C>T)                                                    | HGMD          | +1                                                           |
|                       |       | F356L                   | chr18:23556501-23556503                                        | Niemann-Pick disease C (NM_000271.4(NPC1):c.1065delC (p.Phe356Serfs))                     | ClinVar       | 0                                                            |

<sup>(1)</sup> Human disease-modulating variants in HGVS nomenclature

<sup>(2)</sup> Position of convergent substitution relative to human disease-modulating variant: 0=exact overlap; +1=convergent substitution is one codon upstream of variant (i.e. towards N-terminus); -1=convergent substitution is one codon downstream of variant (i.e. towards C-terminus)

**Table S3. Convergent sites proximal to known human disease-modulating variants.** Shown are the parallel convergent sites from Table 1 that overlap or are within one codon of a known human disease variant from HGMD(3) or ClinVar(4).

| Convergent adaptation | Term ID    | Term                                                     | Total # term genes | Total # term amino acid positions | # convergent term genes | # convergent term positions | # divergent term genes | # divergent term positions | Fold enrichment (convergent) | Fold enrichment (divergent) | p-value (convergent) | p-value (divergent) | q-value (convergent) | q-value (divergent) |
|-----------------------|------------|----------------------------------------------------------|--------------------|-----------------------------------|-------------------------|-----------------------------|------------------------|----------------------------|------------------------------|-----------------------------|----------------------|---------------------|----------------------|---------------------|
| Echolocation          | MP:0002857 | cochlear ganglion degeneration                           | 53                 | 30304                             | 18                      | 25                          | 11                     | 15                         | 3.2                          | 1.3                         | 7.19E-07             | 1.82E-01            | 2.17E-03             | 1                   |
|                       | MP:0002855 | abnormal cochlear ganglion morphology                    | 82                 | 41563                             | 21                      | 28                          | 13                     | 18                         | 2.6                          | 1.1                         | 7.34E-06             | 3.16E-01            | 1.05E-02             | 1                   |
| Aquatic               | MP:0001192 | scaly skin                                               | 49                 | 24105                             | 15                      | 27                          | 10                     | 12                         | 4.1                          | 1.6                         | 1.79E-09             | 8.42E-02            | 3.86E-06             | 1                   |
|                       | MP:0001240 | abnormal epidermis stratum corneum morphology            | 125                | 54056                             | 23                      | 42                          | 22                     | 32                         | 2.8                          | 1.9                         | 3.90E-09             | 6.84E-04            | 5.60E-06             | 0.109               |
|                       | MP:0001198 | tight skin                                               | 17                 | 14592                             | 4                       | 17                          | 5                      | 8                          | 4.2                          | 1.7                         | 1.04E-06             | 9.44E-02            | 6.42E-04             | 1                   |
|                       | MP:0001242 | hyperkeratosis                                           | 90                 | 35761                             | 16                      | 28                          | 15                     | 21                         | 2.9                          | 1.9                         | 1.31E-06             | 5.76E-03            | 7.05E-04             | 0.421               |
|                       | MP:0010955 | abnormal respiratory electron transport chain            | 55                 | 16684                             | 16                      | 18                          | 3                      | 3                          | 3.9                          | 0.6                         | 1.48E-06             | 8.96E-01            | 7.10E-04             | 1                   |
|                       | MP:0002841 | impaired skeletal muscle contractility                   | 35                 | 30160                             | 13                      | 25                          | 8                      | 14                         | 3                            | 1.5                         | 1.79E-06             | 1.01E-01            | 7.73E-04             | 1                   |
|                       | MP:0006036 | abnormal mitochondrial physiology                        | 115                | 46768                             | 26                      | 32                          | 5                      | 5                          | 2.5                          | 0.3                         | 3.88E-06             | 9.99E-01            | 1.46E-03             | 1                   |
|                       | MP:0001212 | skin lesions                                             | 111                | 53776                             | 23                      | 35                          | 22                     | 28                         | 2.4                          | 1.7                         | 4.07E-06             | 7.95E-03            | 1.46E-03             | 0.475               |
|                       | MP:0010954 | abnormal cellular respiration                            | 97                 | 33894                             | 21                      | 25                          | 5                      | 6                          | 2.7                          | 0.6                         | 1.28E-05             | 9.56E-01            | 3.96E-03             | 1                   |
|                       | MP:0001231 | abnormal epidermis stratum basale morphology             | 55                 | 34579                             | 12                      | 24                          | 10                     | 14                         | 2.5                          | 1.3                         | 4.88E-05             | 2.08E-01            | 1.00E-02             | 1                   |
|                       | MP:0010814 | absent alveolar lamellar bodies                          | 11                 | 5997                              | 2                       | 9                           | 2                      | 3                          | 5.5                          | 1.6                         | 5.45E-05             | 2.94E-01            | 1.02E-02             | 1                   |
|                       | MP:0004091 | abnormal Z lines                                         | 31                 | 24304                             | 8                       | 19                          | 5                      | 8                          | 2.8                          | 1                           | 6.46E-05             | 4.99E-01            | 1.11E-02             | 1                   |
|                       | MP:0003941 | abnormal skin development                                | 22                 | 14812                             | 5                       | 14                          | 3                      | 3                          | 3.4                          | 0.6                         | 8.52E-05             | 8.45E-01            | 1.36E-02             | 1                   |
|                       | MP:0002796 | impaired skin barrier function                           | 64                 | 31323                             | 9                       | 22                          | 11                     | 15                         | 2.6                          | 1.5                         | 8.37E-05             | 7.58E-02            | 1.36E-02             | 1                   |
|                       | MP:0005048 | thrombosis                                               | 91                 | 48149                             | 22                      | 28                          | 12                     | 19                         | 2.1                          | 1.3                         | 2.32E-04             | 1.91E-01            | 2.99E-02             | 1                   |
|                       | MP:0001429 | dehydration                                              | 77                 | 38747                             | 13                      | 24                          | 7                      | 10                         | 2.3                          | 0.8                         | 2.61E-04             | 7.77E-01            | 3.22E-02             | 1                   |
|                       | MP:0000764 | abnormal tongue epithelium morphology                    | 21                 | 16673                             | 6                       | 14                          | 3                      | 5                          | 3.1                          | 1                           | 2.82E-04             | 6.04E-01            | 3.38E-02             | 1                   |
|                       | MP:0010813 | abnormal alveolar lamellar body morphology               | 28                 | 13026                             | 5                       | 12                          | 5                      | 6                          | 3.4                          | 1.5                         | 3.35E-04             | 2.31E-01            | 3.90E-02             | 1                   |
|                       | MP:0011159 | abnormal epidermal-dermal junction morphology            | 10                 | 13145                             | 6                       | 12                          | 2                      | 4                          | 3.3                          | 1                           | 3.63E-04             | 5.94E-01            | 4.12E-02             | 1                   |
|                       | MP:0001209 | spontaneous skin ulceration                              | 32                 | 15456                             | 10                      | 13                          | 6                      | 6                          | 3.1                          | 1.2                         | 4.52E-04             | 3.61E-01            | 4.75E-02             | 1                   |
| MP:0000751            | myopathy   | 44                                                       | 35397              | 10                                | 22                      | 11                          | 20                     | 2.3                        | 1.8                          | 4.42E-04                    | 1.02E-02             | 4.75E-02            | 0.529                |                     |
| High altitude         | MP:0005629 | abnormal lung weight                                     | 52                 | 25252                             | 16                      | 25                          | 5                      | 10                         | 2.7                          | 0.8                         | 1.35E-05             | 7.97E-01            | 1.95E-02             | 1                   |
|                       | MP:0005350 | increased susceptibility to autoimmune disorder          | 126                | 38001                             | 18                      | 32                          | 16                     | 21                         | 2.3                          | 1.1                         | 2.25E-05             | 3.31E-01            | 1.95E-02             | 1                   |
|                       | MP:0002790 | decreased circulating follicle stimulating hormone level | 26                 | 10872                             | 7                       | 14                          | 3                      | 10                         | 3.5                          | 1.9                         | 7.50E-05             | 4.67E-02            | 2.81E-02             | 0.431               |
|                       | MP:0004953 | decreased spleen weight                                  | 65                 | 27766                             | 17                      | 25                          | 14                     | 22                         | 2.4                          | 1.6                         | 6.14E-05             | 2.29E-02            | 2.81E-02             | 0.294               |
|                       | MP:0005027 | increased susceptibility to parasitic infection          | 75                 | 17160                             | 11                      | 18                          | 12                     | 14                         | 2.8                          | 1.7                         | 1.03E-04             | 4.95E-02            | 3.31E-02             | 0.445               |

**Table S4.** All ontology terms passing the criteria for the combined convergence-divergence test (see main text). For each experiment, the terms are sorted by *q-value* (convergent) and then fold enrichment (convergent). The top term from each experiment, discussed in the main text, is highlighted in blue.

## References for Supplementary Information

1. Grillet N, et al. (2009) Mutations in LOXHD1, an evolutionarily conserved stereociliary protein, disrupt hair cell function in mice and cause progressive hearing loss in humans. *Am J Hum Genet* 85(3):328–337.
2. O’Leary MA, et al. (2013) The Placental Mammal Ancestor and the Post–K-Pg Radiation of Placentals. *Science* 339(6120):662–667.
3. Stenson PD, et al. (2003) Human Gene Mutation Database (HGMD): 2003 update. *Hum Mutat* 21(6):577–581.
4. Landrum MJ, et al. (2018) ClinVar: improving access to variant interpretations and supporting evidence. *Nucleic Acids Res* 46(D1):D1062–D1067.
